# Supplementary material
Source: publisher site journal article supplement (https://www.dovepress.com/get_supplementary_file.php?f=257965.docx)
Supplement: Supplementary file 1 [file get_supplementary_file.php]

**Supplementary data**

**Predictive value of exhaled nitric oxide and blood eosinophil count in the assessment of airway eosinophilia in COPD**

Balazs Antus,1,2 Csilla Paska,1 Imre Barta1

1 Department of Pathophysiology, National Koranyi Institute of Pulmonology, Piheno ut 1, H-1121 Budapest, Hungary

2 Department of Pulmonology, National Koranyi Institute of Pulmonology, Piheno ut 1, H-1121 Budapest, Hungary

**Results**

*Clinical variables during treatment of AECOPD*

Exacerbations were treated with systemic glucocorticoids, bronchodilators (short- or long-acting anticholinergics and/or β2-agonists) and oxygen in all cases. Antibiotics were given to 45 patients. During the course of recovery from exacerbation lung function variables and arterial oxygen tension (PaO2) increased, while FENO50 levels, sputum total cell counts and the number of sputum neutrophils, lymphocytes and eosinophils decreased (Table S1 and S2).

**Table S1.** Clinical parameters of AECOPD patients at the time of hospital admission and at discharge following treatment

|  |  | | |  | | |
| --- | --- | --- | --- | --- | --- | --- |
|  | **AECOPD** | | | | | |
|  |  | | |  | | |
| **Pulmonary function**  **FVC (L)**  **FVC (% predicted)**  **FEV1 (L)**  **FEV1 (% predicted)**  **FEV1/FVC** | **At admission** | | | **At discharge** | | |
| 1.91  64.0  0.90  38.2  0.48 | ±  ±  ±  ±  ± | 0.08  2.23  0.05  1.85  0.02 | 2.14  72.0  1.05  45.4  0.50 | ±  ±  ±  ±  ± | 0.09**  2.56***  0.05***  2.17***  0.01* |
| **Blood gases**  **PaCO2 (kPa)**  **PaO2 (kPa)** | 5.58  7.10 | ±  ± | 0.15  0.16 | 6.0  7.78 | ±  ± | 0.19  0.17* |
| **FENO50 (ppb)** | 14.1 (7.1-27.6) | | | 9.7 (6.9-14.9)** | | |
| **Laboratory data**  **WBC (cells ×109/L)**  **Eosinophils (cells ×109/L)**  **Eosinophils (%)**  **CRP (mg/L)** | 11.6 | ± | 0.7 | 13.6 | ± | 0.89 |
| 0.0 (0.0-0.11) | | | 0.1 (0.0-0.14) | | |
| 0.0 (0.0-1.0) | | | 1.0 (0.0-1.0) | | |
| 39.9 | ± | 7.6 | 12.4 | ± | 3.1** |

**Notes:** Data are presented as mean ± SEM or median (interquartile ranges). *p<0.05, **p<0.01 and ***p<0.001 vs. admission.

**Abbrevations:** FVC, forced vital capacity; FEV1, forced expiratory volume in one second; FENO50, fractional exhaled nitric oxide measured at an exhalation flow rate of 50 mL/s; ppb, parts per billion; PaCO2, arterial carbon dioxide tension; PaO2, arterial oxygen tension; WBC, white blood cell count; CRP, C-reactive protein.

**Table S2.** Total and differential sputum cell counts in AECOPD patients at the time of hospital admission and at discharge following treatment

|  |  |  |
| --- | --- | --- |
|  | **AECOPD** | |
| **At admission** | **At discharge** |
|  |  |  |
| **Total cell counts ×106/g** | 1.93 (0.72-6.81) | 1.54 (0.67-3.55)* |
| **Neutrophils**  **%**  **×106/g** | 93.3 (83.3-95.4)  1.7 (0.57-6.41) | 91.7 (82.5-96.2)  1.36 (0.51-3.38)* |
| **Macrophages**  **%**  **×105/g** | 2.14 (0.92-5.54)  0.43 (0.16-1.5) | 2.87 (1.46-8.54)*  0.71 (0.19-1.17) |
| **Lymphocytes**  **%**  **×104/g** | 3.77 (1.9-5.62)  7.6 (2.9-25.2) | 2.78 (1.49-5.25)  4.1 (1.8-11.1)** |
| **Eosinophils**  **%**  **×104/g** | 0.0 (0.0-1.61)  0.0 (0.0-3.31) | 0.0 (0.0-0.77)*  0.0 (0.0-1.25)* |

**Notes:** Data are presented as median (interquartile ranges). *p<0.05 and **p<0.005 vs. admission.

**Table S3.** Summary of sensitivity, specificity, PPV and NPV of FENO50 and blood eosinophil measurements for assessing airway eosinophilia in stable COPD patients and AECOPD patients

| **Stable COPD** | | | | |
| --- | --- | --- | --- | --- |
|  |  |  |  |  |
| **Measurement** | **Sensitivity (%)** | **Specificity**  **(%)** | **PPV**  **(%)** | **NPV**  **(%)** |
| FENO50 | 50-63 | 75-91 | 44-56 | 79-93 |
| Blood eosinophils absolute count  percentage | 75-77  75-77 | 76-98  63-84 | 53-86  42-46 | 91-95  89-95 |
| **AECOPD** | | | | |
|  |  |  |  |  |
| **Measurement** | **Sensitivity (%)** | **Specificity (%)** | **PPV**  **(%)** | **NPV**  **(%)** |
| FENO50 | 64-70 | 69 | 29-36 | 88-93 |
| Blood eosinophils absolute count  percentage | 20-40  20-21 | 92-94  94-96 | 40-60  40-60 | 83-86  81-86 |

**Notes:** Data are presented as ranges depending on whether airway eosinophilia was defined as >2% or >3% sputum eosinophil cell count.

**Abbreviations:** FENO50, fractional exhaled nitric oxide measured at an exhalation flow rate of 50 mL/s; PPV, positive predictive value; NPV, negative predictive value.
